# Supplementary material for: Gout After Total Knee Arthroplasty
Source: PubMed Central journal article supplement — Arthroplast Today. 2020 Apr 8;6(2):278–82. doi: 10.1016/j.artd.2020.03.003 (PMC7303497; doi:10.1016/j.artd.2020.03.003), 2020-04-08
Supplement: mmc3.pdf [file mmc3.pdf]

# CONFLICT OF INTEREST STATEMENT

## *American Association of Hip and Knee Surgeons*

(Adopted from the American Academy of Orthopaedic Surgeons disclosure statement)

The following form **must be filled out completely and submitted by each author (example, 6 authors, 6 forms).** **All items require a response. If there is no relevant disclosure for a given item, enter "None."**

Manuscript Title

1. Royalties from a company or supplier (The following conflicts were disclosed)  
None
2. Speakers bureau/paid presentations for a company or supplier (The following conflicts were disclosed)  
Applied Medical
- 3A. Paid employee for a company or supplier (The following conflicts were disclosed)  
None
- 3B. Paid consultant for a company or supplier (The following conflicts were disclosed)  
None
- 3C. Unpaid consultants for a company or supplier (The following conflicts were disclosed)  
None
4. Stock or stock options in a company or supplier (The following conflicts were disclosed)  
ROM3 Rehab
5. Research support from a company or supplier as a Principal Investigator (The following conflicts were disclosed)  
None
6. Other financial or material support from a company or supplier (The following conflicts were disclosed)  
None
7. Royalties, financial or material support from publishers (The following conflicts were disclosed)  
None
8. Medical/Orthopaedic publications editorial/governing board (The following conflicts were disclosed)  
None
9. Board member/committee appointments for a society (The following conflicts were disclosed)  
None

**Each author must sign AND print or type his/her name, date and submit a separate form**

In addition, one BLINDED Conflict of Interest form (no author names used) should be submitted per manuscript with all author disclosures.

SCOTT WINGERTER



9/18/19

Author Name (Print or Type)

Author Signature

Date
